# Supplementary material for: Dynamics of the formation of a hydrogel by a pathogenic amyloid peptide: islet amyloid polypeptide
Source: PubMed Central journal article supplement (PMC4989184; doi:10.1038/srep32124), 2016-08-18

# Dynamics of the formation of a hydrogel by a pathogenic amyloid peptide: islet amyloid polypeptide

Létitia Jean, Chiu Fan Lee, Peter Hodder, Nick Hawkins and David J. Vaux

## Supplementary information

**Fig. 1.** Rheological behaviour of DMSO in H<sub>2</sub>O and linear viscoelastic region for IAPP in H<sub>2</sub>O and D<sub>2</sub>O. (a) Dynamic moduli G' and G'' as a function of time for DMSO in H<sub>2</sub>O (*left panel*). G' and G'' as a function of oscillation displacement for a solution of 4 μM IAPP in H<sub>2</sub>O (*right panel*). (b) G' and G'' as a function of oscillation displacement for a solution of 4 μM IAPP in D<sub>2</sub>O. (c) Dynamic moduli G' and G'' as a function of time for 4 μM liposomes in H<sub>2</sub>O.

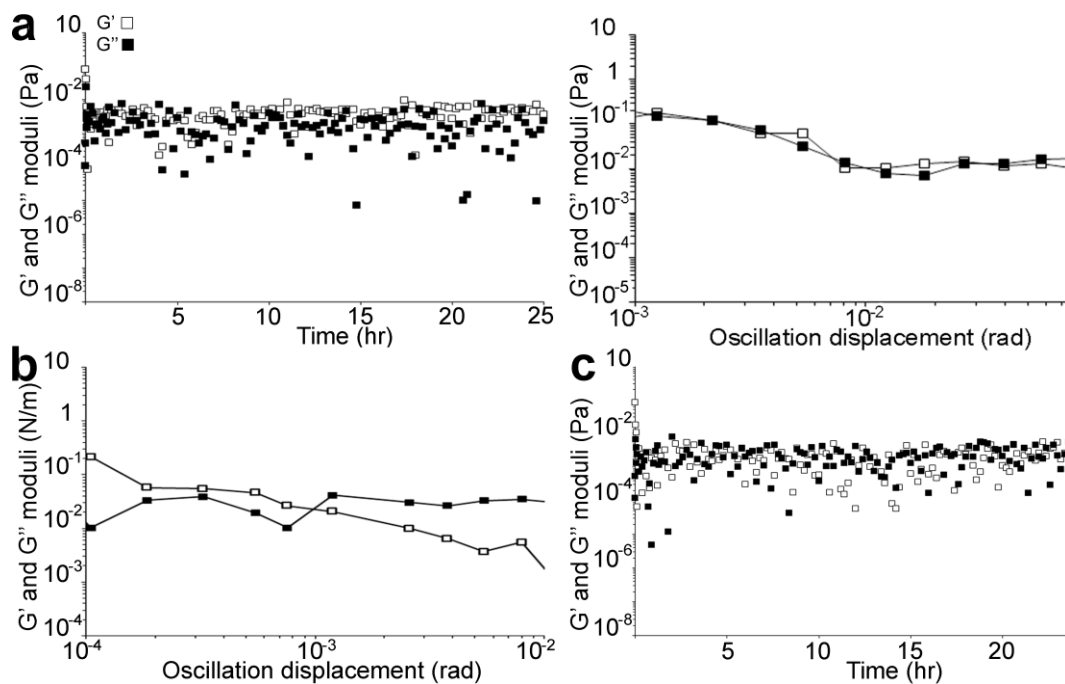

**Fig. 2.** Lag times of the gelation processes. (a) Zoom in on the lag phases of the rheology of a 4  $\mu\text{M}$  IAPP solution in  $\text{H}_2\text{O}$  or  $\text{D}_2\text{O}$ . Dynamic moduli  $G'$  and  $G''$  as a function of time are represented. (b) Zoom in on the lag phases of the rheology of a 4  $\mu\text{M}$  IAPP solution in  $\text{H}_2\text{O}$  in presence of 4  $\mu\text{M}$  liposomes (7 DOPC:3 DOPG). Dynamic moduli  $G'$  and  $G''$  as a function of time are represented.

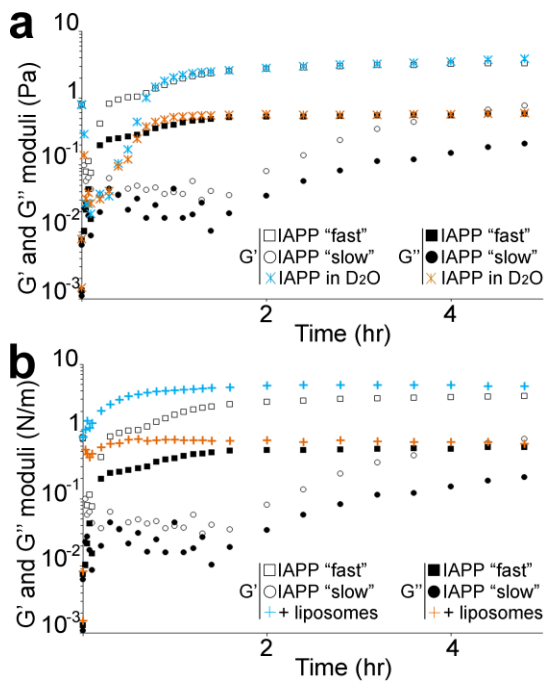

**Fig. 3.** IAPP forms a 3D hydrogel by following two distinct kinetic regimes, which formation is dependent on HHI. Rheological properties of a 4  $\mu\text{M}$  IAPP solution in water, in absence (a) or presence (b) of 4  $\mu\text{M}$  liposomes (7:3 ratio of DOPC to DOPG), were assessed at  $25^\circ\text{C}$  with a controlled displacement of  $5 \times 10^{-3}$  rads and a frequency of 0.5 Hz. The dynamic modulus  $G'$  as a function of time is represented. The *right panel* represents a zoom in over the lag phase time. Each curve represents independent experiments (6 independent experiments in (a) for which 3 showed the fast regime and 3 showed the slow regime). The black curve in (b) represents 5 independent replicates in presence of liposomes.

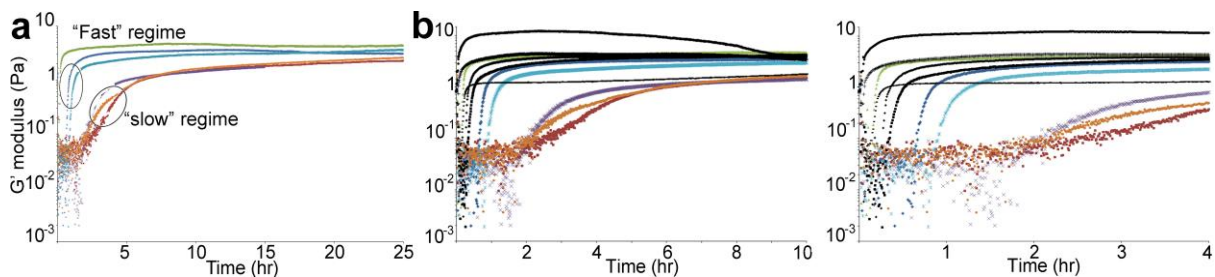

Fig. 4. Morphology of IAPP species from fibrillation reactions in H<sub>2</sub>O or D<sub>2</sub>O. 4 μM IAPP was incubated in PBS with 32 μM ThT in H<sub>2</sub>O (a) or D<sub>2</sub>O (b) at 37°C. Fibrillation reactions were harvested at plateau (as measured by ThT fluorescence). The solutions were adsorbed onto 200 mesh carbon film copper grids, negatively stained with 2% aqueous uranyl acetate, washed with distilled water, air dried, and viewed with a Tecnai electron microscope (Philips). Examples of sections of individual fibrils are shown by arrowheads.

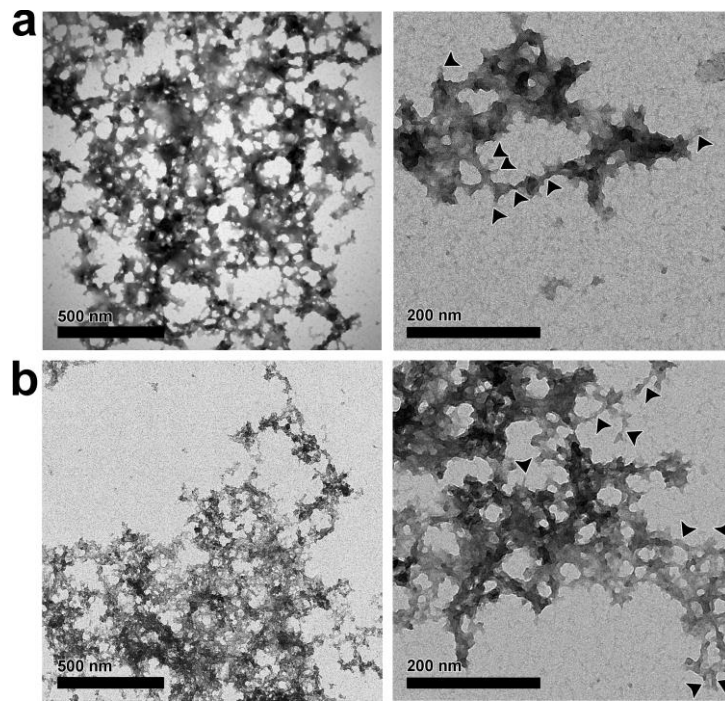

Fig. 5. Hypothetical model for how IAPP solution proceeds to become a gel. Starting from a solution of monomers, fibrillisation and phase separation of monomers and fibrils occur (potentially concurrently) and as a result, dispersed droplets of fibrils and monomers co-exist in the solution. The droplets then grow and coalesce, which leads to a depletion of droplets in the system. Gelation subsequently is initiated within the remaining droplets. Finally, the gelled droplets percolate the whole system.

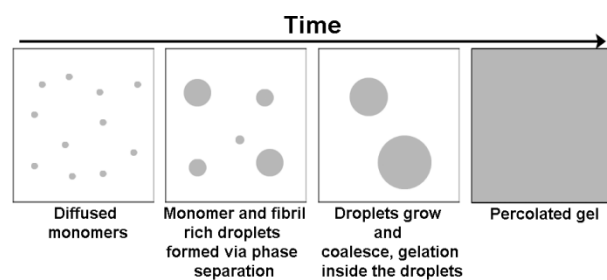

Supplement: srep32124-s1.pdf [file srep32124-s1.pdf]
